# Supplementary material for: ADAM12 abrogation alters immune cell infiltration and improves response to checkpoint blockade therapy in the T11 murine model of triple-negative breast cancer
Source: PubMed Central journal article supplement — Oncoimmunology. 2022 Dec 16;12(1):2158006. doi: 10.1080/2162402X.2022.2158006 (PMC9762783; doi:10.1080/2162402x.2022.2158006), 2022-12-16
Supplement: KONI_A_2158006_SM2650.pdf [file KONI_A_2158006_SM2650.pdf]

**Table S1. Reagents and resources.**

| Reagent or Resource                                                                                              | Source               | Identifier        |
|------------------------------------------------------------------------------------------------------------------|----------------------|-------------------|
| <b>Antibodies</b>                                                                                                |                      |                   |
| Alexa Fluor 700-conjugated anti-CD3 (clone 17A2)                                                                 | BioLegend            | Cat # 100216      |
| Alexa Fluor 700-conjugated rat IgG2b, $\kappa$ isotype control (clone RTK 4530)                                  | BioLegend            | Cat # 400628      |
| Alexa Fluor 647-conjugated anti-Foxp3 (clone MF-14)                                                              | BioLegend            | Cat # 126408      |
| Alexa Fluor 647-conjugated rat IgG2b, $\kappa$ isotype control (clone RTK 4530)                                  | BioLegend            | Cat # 400626      |
| APC-conjugated anti-CD4 (clone RM4-5)                                                                            | BioLegend            | Cat # 100516      |
| APC-conjugated anti-CD19 (clone 6D5)                                                                             | BioLegend            | Cat # 115512      |
| APC-conjugated anti-Ly6C (clone HK1.4)                                                                           | BioLegend            | Cat # 128016      |
| APC-conjugated anti-CD11c (clone N418)                                                                           | BioLegend            | Cat # 117309      |
| APC-conjugated rat IgG2a, $\kappa$ isotype control (clone RTK 2758)                                              | BioLegend            | Cat # 400511      |
| APC-conjugated Armenian hamster IgG isotype control (clone HTK888)                                               | BioLegend            | Cat # 400911      |
| Brilliant Violet 785-conjugated anti-CD4 (clone RM4-5)                                                           | BioLegend            | Cat # 100552      |
| Brilliant Violet 785-conjugated anti-CD11b (clone M1/70)                                                         | BioLegend            | Cat # 101243      |
| Brilliant Violet 711-conjugated anti-Ly6G (clone 1A8)                                                            | BioLegend            | Cat # 127643      |
| Brilliant Violet 785-conjugated rat IgG2a, $\kappa$ isotype control (clone RTK 2758)                             | BioLegend            | Cat # 400546      |
| FITC-conjugated anti-CD45 (clone 30-F11)                                                                         | BioLegend            | Cat # 103108      |
| FITC-conjugated rat IgG2b, $\kappa$ isotype control (clone RTK 4530)                                             | BioLegend            | Cat # 400605      |
| PE-conjugated anti-CD8a (clone 53-6.7)                                                                           | BioLegend            | Cat # 100707      |
| PE-conjugated anti-Ly6C (clone 1A8)                                                                              | BioLegend            | Cat # 127607      |
| PE-conjugated anti-F4/80 (clone BM8)                                                                             | BioLegend            | Cat # 123110      |
| PE-conjugated rat IgG2a, $\kappa$ isotype control (clone RTK 2758)                                               | BioLegend            | Cat # 400507      |
| PE/Cyanine7-conjugated anti-CD8a (clone 53-6.7)                                                                  | BioLegend            | Cat # 100721      |
| PE/Cyanine7-conjugated anti-CD49b (clone DX5)                                                                    | BioLegend            | Cat # 108921      |
| PE/Cyanine7-conjugated rat IgG2a, $\kappa$ isotype control (clone RTK 2758)                                      | BioLegend            | Cat # 400521      |
| TruStain FcX Plus anti-CD16/32 (clone S17011E)                                                                   | BioLegend            | Cat # 156604      |
| <i>In Vivo</i> MAb anti-mouse CTLA-4 (CD152) (clone 9D9)                                                         | BioXcell             | Cat # BE0164      |
| <i>In Vivo</i> MAb anti-mouse PD-1 (CD279) (clone RMP1-14)                                                       | BioXcell             | Cat # BE0146      |
| <i>In Vivo</i> MAb mouse IgG2b isotype control (clone MPC-11)                                                    | BioXcell             | Cat # BE0086      |
| <i>In Vivo</i> MAb rat IgG2a isotype control (clone 2A3)                                                         | BioXcell             | Cat # BE0089      |
| Ultra-LEAF™ purified anti-mouse CD20 (clone SA271G2)                                                             | BioLegend            | Cat # 152115      |
| Ultra-LEAF™ purified rat IgG2b, $\kappa$ isotype control (clone RTK4530)                                         | BioLegend            | Cat # 400671      |
| Ultra-LEAF™ purified anti-CXCL12 (SDF-1 $\beta$ ) (clone W15149B)                                                | BioLegend            | Cat # 939903      |
| Purified rat IgG2a, $\kappa$ isotype control (clone RTK2758)                                                     | BioLegend            | Cat # 400502      |
| Anti-CD29 (clone 18/CD29)                                                                                        | BD Biosciences       | Cat # 610467      |
| Rabbit polyclonal anti-ADAM12 antibody raised against amino acid 774-791 of the cytoplasmic tail of mouse ADAM12 | Bethyl Laboratories  | Custom-made       |
| <b>Reagents</b>                                                                                                  |                      |                   |
| ACK Lysing Buffer                                                                                                | Gibco                | Cat # A1049201    |
| AMD 3100 octahydrochloride                                                                                       | TOCRIS               | Cat # 3299        |
| Alt-R® S.p.HiFi Cas9 Nuclease V3                                                                                 | IDT                  | Cat # 1081060     |
| Alt-R® Cas9 Electroporation Enhancer                                                                             | IDT                  | Cat # 1075915     |
| BCA Protein Assay Kit                                                                                            | ThermoFisher         | Cat # 23225       |
| Bovine Serum Albumin                                                                                             | Amresco              | Cat # 9048-46-8   |
| Collagenase type IV                                                                                              | Sigma                | Cat # C5138       |
| Concanavalin A agarose                                                                                           | Sigma                | Cat # C7555       |
| Cyto-Last Buffer                                                                                                 | BioLegend            | Cat # 422501      |
| DNase type IV                                                                                                    | Sigma                | Cat # D5025       |
| DuoSet ELISA Ancillary Reagent Kit 2                                                                             | R&D Systems          | Cat # DY008       |
| eFluor 450 Fixable Viability Dye                                                                                 | Invitrogen           | Cat # 65086314    |
| EZ-Link Sulfo-NHS-LC-Biotin                                                                                      | Thermo Scientific    | Cat # 21335       |
| Fetal Bovine Serum                                                                                               | Corning              | Cat # MT35015CV   |
| Hyaluronidase type IV-S                                                                                          | Sigma                | Cat # H3884       |
| KN2.0, non-homology mediated CRISPR knockout kit                                                                 | OriGene              | Cat # KN508813    |
| Mouse CXCL12/SDF-1 $\alpha$ Quantikine ELISA kit                                                                 | R&D Systems          | Cat # MCX120      |
| Neon™ Transfection System Kit                                                                                    | Invitrogen           | Cat # MPK1096     |
| NeutrAvidin agarose                                                                                              | Thermo Scientific    | Cat # 29200       |
| Percoll                                                                                                          | Cytiva               | Cat # 17544502    |
| Phusion Green Hot Start II High-fidelity PCR master mix                                                          | ThermoFisher         | Cat # F566S       |
| Precision Count Beads                                                                                            | BioLegend            | Cat # 424902      |
| Propidium Iodine Staining Solution                                                                               | Sigma                | Cat # P4864       |
| Quick Change II Site-Directed mutagenesis Kit                                                                    | Agilent Technologies | Cat # 200523-5    |
| Transforming growth factor $\beta$                                                                               | R&D Systems          | Cat # 7666-MB-005 |
| True Nuclear transcription factor buffer set                                                                     | BioLegend            | Cat # 424401      |
| Turbfectin 8.0                                                                                                   | OriGene              | Cat # TF81001     |
| UltraComp eBeads Compensation Beads                                                                              | Invitrogen           | Cat # 01-2222-42  |

**Table S2. Claudin-low ER-PR-HER2- tumors from the METABRIC study.**

Retrieved from cBioPortal at <https://www.cbioportal.org>.

Classification into "core claudin-low" and "other claudin-low" is according to Fougner C, Bergholtz H, Norum JH, Sorlie T. "Re-definition of claudin-low as a breast cancer phenotype". *Nat Commun* 2020;11:1787.

| Core claudin-low | Other claudin-low |
|------------------|-------------------|
| Patient_ID       | Patient_ID        |
| MB-0634          | MB-0157           |
| MB-2724          | MB-0164           |
| MB-0489          | MB-0206           |
| MB-7008          | MB-0211           |
| MB-2993          | MB-0238           |
| MB-0617          | MB-0303           |
| MB-3752          | MB-0352           |
| MB-0284          | MB-0354           |
| MB-7078          | MB-0400           |
| MB-0494          | MB-0401           |
| MB-3395          | MB-0414           |
| MB-2963          | MB-0420           |
| MB-5392          | MB-0446           |
| MB-0893          | MB-0558           |
| MB-0220          | MB-0608           |
| MB-7023          | MB-0613           |
| MB-0495          | MB-0627           |
| MB-5162          | MB-0658           |
| MB-5408          | MB-0906           |
| MB-2643          | MB-2833           |
| MB-0470          | MB-2850           |
| MB-0289          | MB-2857           |
| MB-0540          | MB-2904           |
| MB-2556          | MB-2957           |
| MB-0424          | MB-3001           |
| MB-0265          | MB-3062           |
| MB-7025          | MB-3067           |
| MB-0269          | MB-3271           |
| MB-0174          | MB-3292           |
| MB-0502          | MB-3383           |
| MB-0179          | MB-3476           |
|                  | MB-3567           |
|                  | MB-3702           |
|                  | MB-4416           |
|                  | MB-4622           |
|                  | MB-4696           |
|                  | MB-4733           |
|                  | MB-4859           |
|                  | MB-4865           |
|                  | MB-4888           |
|                  | MB-4893           |
|                  | MB-4904           |
|                  | MB-4931           |
|                  | MB-4942           |
|                  | MB-5041           |
|                  | MB-5052           |
|                  | MB-5065           |
|                  | MB-5100           |
|                  | MB-5222           |
|                  | MB-5223           |
|                  | MB-5323           |
|                  | MB-5348           |
|                  | MB-5440           |
|                  | MB-5450           |
|                  | MB-5531           |
|                  | MB-5548           |
|                  | MB-5572           |
|                  | MB-5577           |
|                  | MB-5616           |
|                  | MB-5633           |
|                  | MB-5651           |
|                  | MB-6052           |
|                  | MB-6055           |
|                  | MB-6062           |
|                  | MB-6143           |
|                  | MB-6144           |
|                  | MB-6188           |
|                  | MB-6272           |
|                  | MB-6305           |
|                  | MB-7017           |
|                  | MB-7052           |
|                  | MB-7081           |
|                  | MB-7089           |
|                  | MB-7121           |
|                  | MB-7158           |

**Table S3. Immune gene signatures analyzed in the study.**

| <b>CD4+ Th1 cell signature</b><br><i>(Gu-Trantien et al., J Clin Invest 2013;123:2873-2892)</i> |        |        |         |  |  |  |
|-------------------------------------------------------------------------------------------------|--------|--------|---------|--|--|--|
| CCND2                                                                                           | CTLA4  | RAB33A | STAT1   |  |  |  |
| CD38                                                                                            | RAB27A | SH2D2A | TNFRSF4 |  |  |  |

| <b>CD4+ Tfh cell signature</b><br><i>(Gu-Trantien et al., J Clin Invest 2013;123:2873-2892, and Hollern et al., Cell 2019;179:1191-1206)</i> |        |      |      |
|----------------------------------------------------------------------------------------------------------------------------------------------|--------|------|------|
| CXCL13                                                                                                                                       | CD40LG | MAF  | ICOS |
| CXCR5                                                                                                                                        | PDCD1  | IL21 |      |

| <b>B cell signature</b><br><i>(Hollern et al., Cell 2019;179:1191-1206, Danaher et al., J Immunother Cancer 2017;5:18, and Iglesia et al., Clin Cancer Res 2014;20:3818-3829)</i> |       |       |       |        |          |      |
|-----------------------------------------------------------------------------------------------------------------------------------------------------------------------------------|-------|-------|-------|--------|----------|------|
| BANK1                                                                                                                                                                             | CD22  | CR2   | IGHG1 | JCHAIN | TNFRSF17 | IRF4 |
| BLK                                                                                                                                                                               | CD79A | EBF1  | IGKC  | MS4A1  | SDC1     |      |
| CD19                                                                                                                                                                              | CD79B | FFAR1 | IL9R  | VPREB3 | XBP1     |      |

| <b>TLS signature</b><br><i>(Crotty, Nat Rev Immunol 2015;15:185-189)</i> |       |        |
|--------------------------------------------------------------------------|-------|--------|
| CCL19                                                                    | CCL21 | CXCL13 |

| <b>TIM signature</b><br><i>(Cassetta et al., Cancer Cell 2019;35:588-602)</i> |        |       |         |        |         |       |
|-------------------------------------------------------------------------------|--------|-------|---------|--------|---------|-------|
| AIF1                                                                          | CCL4   | DOK2  | GBP5    | LAIR1  | PSMB9   | VSIG4 |
| C1QA                                                                          | CCL8   | FCN1  | GIMAP6  | LAP3   | SIGLEC1 |       |
| C1QB                                                                          | CD4    | FGD2  | HCST    | LILRB4 | TCN2    |       |
| C1QC                                                                          | CD40   | FOLR2 | HLA-DOA | LST1   | TLR7    |       |
| CCL2                                                                          | CD83   | GBP1  | IRF8    | NCF1C  | TNFAIP3 |       |
| CCL3                                                                          | CLEC7A | GBP4  | ITGB2   | PLTP   | VAV1    |       |

| <b>TIN/PMN-MDSC signature</b><br><i>(Kim et al., Nature Cell Biol 2019;21:1113-1126)</i> |        |        |         |          |        |         |
|------------------------------------------------------------------------------------------|--------|--------|---------|----------|--------|---------|
| AMBIP                                                                                    | CCL5   | CISH   | EGR1    | HLA-DQB1 | NFKBIZ | SOCS3   |
| ARG1                                                                                     | CCL7   | CLEC6A | EGR2    | HSPA1A   | NUPR1  | TNFAIP3 |
| ATF3                                                                                     | CCL8   | CSF1   | FOSB    | IER3     | P2RY6  |         |
| CCL2                                                                                     | CCRL2  | CXCL1  | GADD45B | IGFBP6   | PLK3   |         |
| CCL3                                                                                     | CD14   | CXCL2  | GPR35   | MMP12    | RGS1   |         |
| CCL4                                                                                     | CDKN1A | DUSP16 | HLA-DMB | MS4A6A   | SOAT2  |         |

**Table S4. Murine tumors and normal mammary gland samples.**

Retrieved from Gene Expression Omnibus (GEO) at <https://www.ncbi.nlm.nih.gov/geo/>, datasets GSE3165, GSE8516, GSE9343, GSE14457, GSE15263, GSE17916, GSE27101, and GSE42640. Classification into "claudin-low" and "other" tumor types is according to Pfeifferle AD, Herschkowitz JJ, Usary J, Harrell JC, Spike BT, Adams JR, Torres-Arroyos MI, Brown M, Egan SE, Wahl GM, Rosen JM, Perou CM. "Transcriptomic classification of genetically engineered mouse models of breast cancer identifies human subtype counterparts". *Genome Biol* 2013;14:R125.

| Claudin low tumors |                                             | Other tumors |                                                                  | Normal mammary gland tissue |                                        |
|--------------------|---------------------------------------------|--------------|------------------------------------------------------------------|-----------------------------|----------------------------------------|
| GEO number         | Sample name                                 | GEO number   | Sample name                                                      | GEO number                  | Sample name                            |
| GSM1046309         | BALB/c_p53null_2247_transplant_134654       | GSM1046307   | BALB/c_p53null_2153_transplant_137324                            | GSM1046325                  | C57Bl6_Mammary_Norm_131516_GMurrow     |
| GSM1046323         | Balbc_p53het_IR_C1201-4_spontaneous_GMurrow | GSM1046308   | BALB/c_p53null_2224_transplant_137310                            | GSM1046467                  | C57Bl6_Mammary_Norm_131547_GMurrow     |
| GSM1046424         | Balbc_p53null_T1-C1-X1_128333_Perou         | GSM1046310   | BALB/c_p53null_2250_transplant_135434                            | GSM1046468                  | C57Bl6_Mammary_Norm_134742_GMurrow     |
| GSM1046474         | FVB_C3(1)-Tag_117733_untreated_Gmurrow      | GSM1046311   | BALB/c_p53null_2250_transplant_147753                            | GSM1046469                  | C57Bl6_Mammary_Norm_437_1_FURTH        |
| GSM1046480         | FVB_MMTV_Aib1_B348_MBROWN                   | GSM1046312   | BALB/c_p53null_2304_transplant_137326                            | GSM1046470                  | C57Bl6_Mammary_Norm_439_2_FURTH        |
| GSM211519          | MIXED_Brg1het_T176_BULTMAN                  | GSM1046313   | BALB/c_p53null_9263-3_transplant_135008                          | GSM1046471                  | C57Bl6_Mammary_Norm_443_1_FURTH        |
| GSM381097          | MMTV_LPA1-T4_GMills_repeat                  | GSM1046314   | BALBc_p18null_133657                                             | GSM1046927                  | FVB_NJ_NORMAL_CA02_451A_Lactating      |
| GSM381098          | MMTV_LPA1-T4_GMills                         | GSM1046315   | BALBc_p18null_200_XIONG                                          | GSM1046928                  | FVB_NJ_NORMAL_CA03_603A_Lactating      |
| GSM381108          | MMTV_LPA3-T4_GMills                         | GSM1046316   | BALBc_p18null_205_XIONG                                          | GSM69568                    | BALBc_NORMAL_MAMMARYGLAND_100989_SIMIN |
| GSM381109          | MMTV_LPA3-T5_GMills                         | GSM1046317   | BALBc_p18null_228_XIONG                                          | GSM69572                    | BALBc_NORMAL_MAMMARYGLAND_100990_SIMIN |
| GSM661693          | BALBc_p53null_spontaneous_4706L_MEDINA      | GSM1046318   | BALBc_p18null_250_XIONG                                          | GSM69573                    | BALBc_NORMAL_MAMMARYGLAND_100991_SIMIN |
| GSM661705          | Balbc_p53null_2247R_transplant_Gmurrow      | GSM1046319   | BALBc_p18null_411_bRep_XIONG                                     | GSM69574                    | BALBc_NORMAL_MAMMARYGLAND_100992_SIMIN |
| GSM662191          | Balbc_p53null_transplant_2151R_JH           | GSM1046320   | BALBc_p18null_426_XIONG                                          | GSM69575                    | BALBc_NORMAL_MAMMARYGLAND_100993_SIMIN |
| GSM662235          | Balbc_p53null_transplant_753R_JH            | GSM1046321   | BALBc_p18null_474_XIONG                                          | GSM69631                    | FVB_NJ_NORMAL_MAMMARYGLAND_CA02_450A   |
| GSM662244          | FVB_C3(1)-Tag_123049_untreated_Gmurrow      | GSM1046322   | BALBc_p18null_854_XIONG                                          | GSM69632                    | FVB_NJ_NORMAL_MAMMARYGLAND_CA02_489A   |
| GSM69587           | 86D2F1_Wap_T121_580_SIMIN                   | GSM1046472   | FVB_C3(1)-Tag_116966_untreated_GMurrow                           | GSM69633                    | FVB_NJ_NORMAL_MAMMARYGLAND_CA04_677A   |
| GSM69598           | FVB_DMBA_11_Spindle_GLAZER                  | GSM1046473   | FVB_C3(1)-Tag_117485_untreated_GMurrow                           | GSM69634                    | FVB_NJ_NORMAL_MAMMARYGLAND_CA04_678A   |
| GSM69599           | FVB_DMBA_12_Spindle_GLAZER                  | GSM1046475   | FVB_C3(1)-Tag_120209_no_treatment_Perou                          | GSM69635                    | FVB_NJ_NORMAL_MAMMARYGLAND_CA04_679A   |
| GSM69600           | FVB_DMBA_13_Spindle_GLAZER                  | GSM1046476   | FVB_C57Bl6_C3(1)_Tag_117122_HERSCH                               |                             |                                        |
| GSM69610           | FVB_MMTV_Neu_404_GREEN                      | GSM1046477   | FVB_MMTV_Aib1_H323_MBROWN                                        |                             |                                        |
| GSM80430           | C57Bl6_MMTV_Cre_Brc1CoCo_p53het_108b_FURTH  | GSM1046478   | FVB_MMTV_Aib1_J225_MBROWN                                        |                             |                                        |
| GSM80436           | C57Bl6_MMTV_Cre_Brc1CoCo_p53het_88c1_FURTH  | GSM1046479   | FVB_MMTV_Aib1_J246_MBROWN                                        |                             |                                        |
| GSM80437           | C57Bl6_MMTV_Cre_Brc1CoCo_p53het_88a2_FURTH  | GSM1046481   | FVB_MMTV_Aib1_J355_MBROWN                                        |                             |                                        |
| GSM80453           | BALBc_p53null_2657R_PbROWN                  | GSM1046482   | FVB_MMTV_Aib1_J59_MBROWN                                         |                             |                                        |
| GSM80456           | BALBc_p53het_IR_C1301_4_KOLLER              | GSM1046483   | FVB_MMTV_Aib1_T34_MBROWN                                         |                             |                                        |
|                    |                                             | GSM1046484   | FVB_MMTV_Aib1_T36_MBROWN                                         |                             |                                        |
|                    |                                             | GSM1046485   | FVB_MMTV_Aib1_T8_MBROWN                                          |                             |                                        |
|                    |                                             | GSM1046486   | FVB_NR_MMTV_FGF3_465_VARMUS                                      |                             |                                        |
|                    |                                             | GSM1046487   | FVB_NR_MMTV_FGF3_466_VARMUS                                      |                             |                                        |
|                    |                                             | GSM1046488   | FVB_NR_MMTV_FGF3_467_VARMUS                                      |                             |                                        |
|                    |                                             | GSM1046489   | FVB_NR_MMTV_FGF3_468_VARMUS                                      |                             |                                        |
|                    |                                             | GSM1046490   | FVB_NR_MMTV_FGF3_469_VARMUS                                      |                             |                                        |
|                    |                                             | GSM1046491   | NA_MMTV_HRAS_29_VARMUS                                           |                             |                                        |
|                    |                                             | GSM1046492   | NA_MMTV_HRAS_43_VARMUS                                           |                             |                                        |
|                    |                                             | GSM1046493   | NA_MMTV_HRAS_4379-1_LI                                           |                             |                                        |
|                    |                                             | GSM1046494   | NA_MMTV_HRAS_44_VARMUS                                           |                             |                                        |
|                    |                                             | GSM1046495   | NA_MMTV_HRAS_4492_LI                                             |                             |                                        |
|                    |                                             | GSM1046496   | NA_MMTV_HRAS_4633_LI                                             |                             |                                        |
|                    |                                             | GSM1046497   | NA_MMTV_HRAS_4861_LI                                             |                             |                                        |
|                    |                                             | GSM1046498   | NA_MMTV_HRAS_4863_LI                                             |                             |                                        |
|                    |                                             | GSM1046700   | FVB_MMTV_Myc_128491_untreated_GMurrow                            |                             |                                        |
|                    |                                             | GSM1046702   | FVB_MMTV_Myc_128492_untreated_GMurrow                            |                             |                                        |
|                    |                                             | GSM1046704   | FVB_MMTV_Myc_128620_untreated_GMurrow                            |                             |                                        |
|                    |                                             | GSM1046707   | FVB_MMTV_Myc_128818_untreated_GMurrow                            |                             |                                        |
|                    |                                             | GSM1046710   | FVB_MMTV_Myc_128990_untreated_GMurrow                            |                             |                                        |
|                    |                                             | GSM1046714   | FVB_MMTV_Neu_116843-2_untreated_GMurrow                          |                             |                                        |
|                    |                                             | GSM1046717   | FVB_MMTV_Neu_841971_PEROU                                        |                             |                                        |
|                    |                                             | GSM1046720   | FVB_MMTV_PyMT_103671_untreated_GMurrow                           |                             |                                        |
|                    |                                             | GSM1046723   | FVB_MMTV_PyMT_103572-1_untreated_GMurrow                         |                             |                                        |
|                    |                                             | GSM1046725   | FVB_MMTV_PyMT_209T_SHAW                                          |                             |                                        |
|                    |                                             | GSM1046728   | FVB_MMTV_PyMT_257T_SHAW                                          |                             |                                        |
|                    |                                             | GSM1046730   | FVB_MMTV_PyMT_311T_SHAW                                          |                             |                                        |
|                    |                                             | GSM1046733   | FVB_MMTV_PyMT_393T_SHAW                                          |                             |                                        |
|                    |                                             | GSM1046736   | FVB_MMTV_PyMT_423T_SHAW                                          |                             |                                        |
|                    |                                             | GSM1046738   | FVB_MMTV_PyMT_574_PEROU                                          |                             |                                        |
|                    |                                             | GSM1046741   | FVB_MMTV_Wnt1_119265-2_cn_Usary                                  |                             |                                        |
|                    |                                             | GSM1046744   | FVB_MMTV_Wnt1_Z2T.8T_COWIN                                       |                             |                                        |
|                    |                                             | GSM1046747   | FVB_MMTV_Wnt1_Z2T.4T_COWIN                                       |                             |                                        |
|                    |                                             | GSM1046749   | FVB_MMTV_Wnt1_531_USARY                                          |                             |                                        |
|                    |                                             | GSM1046752   | FVB_MMTV_Wnt1_9T.8T_COWIN                                        |                             |                                        |
|                    |                                             | GSM1046755   | FVB_MMTV_Wnt1_CA03_613A_CHURCHILL                                |                             |                                        |
|                    |                                             | GSM1046757   | FVB_MMTV_Neu_121304-2 Non-treated                                |                             |                                        |
|                    |                                             | GSM1046761   | FVB_MMTV_Neu_121575 Non-treated                                  |                             |                                        |
|                    |                                             | GSM1046766   | FVB_MMTV_Neu_121576 Non-treated                                  |                             |                                        |
|                    |                                             | GSM1046769   | FVB_MMTV_Neu_123299 Non-treated                                  |                             |                                        |
|                    |                                             | GSM1046774   | FVB_MMTV_PyMT_117704_Non-treated                                 |                             |                                        |
|                    |                                             | GSM1046778   | FVB_MMTV_PyMT_118021_Non-treated                                 |                             |                                        |
|                    |                                             | GSM1046781   | FVB_MMTV_Wnt1_124607_Non-treated                                 |                             |                                        |
|                    |                                             | GSM1046784   | FVB_MMTV_Wnt1_125799_Non-treated                                 |                             |                                        |
|                    |                                             | GSM1046929   | FVB_Wap_Myc_116885_untreated_GMurrow                             |                             |                                        |
|                    |                                             | GSM1046930   | FVB_Wap_Myc_117166_bRep_PEROU                                    |                             |                                        |
|                    |                                             | GSM1046931   | FVB_Wap_Myc_117250_PEROU                                         |                             |                                        |
|                    |                                             | GSM1046932   | FVB_Wap_Myc_117252_PEROU                                         |                             |                                        |
|                    |                                             | GSM1046933   | FVB_Wap_Myc_117254_PEROU                                         |                             |                                        |
|                    |                                             | GSM1046934   | FVB_Wap_Myc_117318_bRep_PEROU                                    |                             |                                        |
|                    |                                             | GSM1046935   | FVB_Wap_Myc_CA04_812A_CHURCHILL                                  |                             |                                        |
|                    |                                             | GSM1046936   | FVB_Wap_Myc_CA05_868A_CHURCHILL                                  |                             |                                        |
|                    |                                             | GSM1046937   | Mixed_Rb_7_Oct22.0T_UHWC                                         |                             |                                        |
|                    |                                             | GSM1046938   | PIK3CA_Egan_3093                                                 |                             |                                        |
|                    |                                             | GSM1046939   | PIK3CA_Egan_7048A                                                |                             |                                        |
|                    |                                             | GSM1046940   | PIK3CA_Egan_A0853                                                |                             |                                        |
|                    |                                             | GSM1046941   | PIK3CA_Egan_3073                                                 |                             |                                        |
|                    |                                             | GSM1046942   | PIK3CA_Egan_4714                                                 |                             |                                        |
|                    |                                             | GSM1046943   | MMTV-Cre_R26-Pk3caH107R_7281A_2R-Egan                            |                             |                                        |
|                    |                                             | GSM1046944   | MMTV-Cre_R26-Pk3caH107R_7286A_5L-Egan                            |                             |                                        |
|                    |                                             | GSM1046945   | PIK3CA_Egan_9529                                                 |                             |                                        |
|                    |                                             | GSM1046946   | MMTV-Cre_R26-Pk3caH107R_9529_4R-Egan                             |                             |                                        |
|                    |                                             | GSM1046947   | MMTV-Cre_R26-Pk3caH107R_9529_5L-Egan                             |                             |                                        |
|                    |                                             | GSM1046948   | PIK3CA_Egan_A0255                                                |                             |                                        |
|                    |                                             | GSM1046949   | MMTV-Cre_R26-Pk3caH107R_A0835_3L-Egan                            |                             |                                        |
|                    |                                             | GSM1046950   | STAT1-/-_Schreiber_11253                                         |                             |                                        |
|                    |                                             | GSM1046951   | STAT1-/-_Schreiber_4524                                          |                             |                                        |
|                    |                                             | GSM1046952   | STAT1-/-_Schreiber_9444                                          |                             |                                        |
|                    |                                             | GSM1046953   | STAT1-/-_Schreiber_TAC59                                         |                             |                                        |
|                    |                                             | GSM1046954   | STAT1-/-_Schreiber_TAC77                                         |                             |                                        |
|                    |                                             | GSM1046955   | STAT1-/-_Schreiber_TAC78                                         |                             |                                        |
|                    |                                             | GSM1046956   | STAT1-/-_Schreiber_TAC80                                         |                             |                                        |
|                    |                                             | GSM211515    | Brg1+/- murine mammary tumor (MIXED_Brg1het_T135_BULTMAN)        |                             |                                        |
|                    |                                             | GSM211516    | Brg1+/- murine mammary tumor (MIXED_Brg1het_T160_BULTMAN)        |                             |                                        |
|                    |                                             | GSM211517    | Brg1+/- murine mammary tumor (MIXED_Brg1het_T172_BULTMAN)        |                             |                                        |
|                    |                                             | GSM211518    | Brg1+/- murine mammary tumor (MIXED_Brg1het_T172_BULTMAN_biorep) |                             |                                        |
|                    |                                             | GSM211520    | Brg1+/- murine mammary tumor (MIXED_Brg1het_T2023_BULTMAN)       |                             |                                        |

|           |                                                                 |
|-----------|-----------------------------------------------------------------|
| GSM211521 | Brg14- murine mammary tumor (MIXED_Brg1het_T2134_BULTMAN)       |
| GSM211522 | Brg14- murine mammary tumor (MIXED_Brg1het_T221_BULTMAN)        |
| GSM211523 | Brg14- murine mammary tumor (MIXED_Brg1het_T284_BULTMAN)        |
| GSM211524 | Brg14- murine mammary tumor (MIXED_Brg1het_T284_BULTMAN_biorep) |
| GSM211525 | Brg14- murine mammary tumor (MIXED_Brg1het_T372_BULTMAN)        |
| GSM211526 | Brg14- murine mammary tumor (MIXED_Brg1het_T55_BULTMAN)         |
| GSM211527 | Brg14- murine mammary tumor (MIXED_Brg1het_T646_BULTMAN)        |
| GSM211528 | Brg14- murine mammary tumor (MIXED_Brg1het_T920_BULTMAN)        |
| GSM237856 | MIXED_Wap_Cre_ETV6_NTRK3_C117T1_ORKIN                           |
| GSM237857 | MIXED_Wap_Cre_ETV6_NTRK3_C393T1_ORKIN                           |
| GSM237858 | MIXED_Wap_Cre_ETV6_NTRK3_C396T5_ORKIN                           |
| GSM237859 | MIXED_Wap_Cre_ETV6_NTRK3_CR115_ORKIN                            |
| GSM237860 | MIXED_Wap_Cre_ETV6_NTRK3_CR90-1_ORKIN                           |
| GSM237861 | MIXED_Wap_Cre_ETV6_NTRK3_D14T1_ORKIN                            |
| GSM237862 | MIXED_Wap_Cre_ETV6_NTRK3_D14T2_ORKIN                            |
| GSM237863 | MIXED_Wap_Cre_ETV6_NTRK3_D203T1_ORKIN                           |
| GSM237864 | MIXED_Wap_Cre_ETV6_NTRK3_D254T1_ORKIN                           |
| GSM237865 | MIXED_Wap_Cre_ETV6_NTRK3_D279T1_ORKIN                           |
| GSM237866 | MIXED_Wap_Cre_ETV6_NTRK3_D481_ORKIN                             |
| GSM237867 | MIXED_Wap_Cre_ETV6_NTRK3_E93T1_ORKIN                            |
| GSM381089 | Agilent-8440_4                                                  |
| GSM381090 | Agilent-8440_3                                                  |
| GSM381091 | Agilent-8436_4                                                  |
| GSM381092 | Agilent-8439_1                                                  |
| GSM381093 | Agilent-8439_3                                                  |
| GSM381094 | Agilent-9440_4                                                  |
| GSM381095 | Agilent-9441_1                                                  |
| GSM381096 | Agilent-8440_2                                                  |
| GSM381099 | Agilent-9440_1                                                  |
| GSM381100 | Agilent-9441_2                                                  |
| GSM381101 | Agilent-9441_3                                                  |
| GSM381102 | Agilent-8439_2                                                  |
| GSM381103 | Agilent-8437_1                                                  |
| GSM381104 | Agilent-9440_2                                                  |
| GSM381105 | Agilent-8437_4                                                  |
| GSM381106 | Agilent-8439_4                                                  |
| GSM381107 | Agilent-8437_2                                                  |
| GSM447004 | FVB_MMTV_Wnt1_2406.4R_Rosen                                     |
| GSM447559 | FVB_MMTV_Wnt1_2494.2L_Rosen                                     |
| GSM447560 | FVB_MMTV_Wnt1_2495.1L_Rosen                                     |
| GSM447561 | FVB_MMTV_Wnt1_2543-4L_Rosen                                     |
| GSM447562 | FVB_MMTV_Wnt1_3065_Rosen                                        |
| GSM447563 | FVB_MMTV_Wnt1_3718.3R_Rosen                                     |
| GSM447564 | FVB_MMTV_Wnt1_JGFR1_2549_4L_ROSEN                               |
| GSM447565 | FVB_MMTV_Wnt1_JGFR1_3851_5L_ROSEN                               |
| GSM447566 | FVB_MMTV_Wnt1_JGFR1_4004_3L_ROSEN                               |
| GSM447567 | FVB_MMTV_Wnt1_JGFR1_4013_3L_ROSEN                               |
| GSM447568 | FVB_MMTV_Wnt1_JGFR2_2960_5L_ROSEN                               |
| GSM447569 | FVB_MMTV_Wnt1_JGFR2_3068_2L_ROSEN                               |
| GSM447570 | FVB_MMTV_Wnt1_JGFR2_3855_3L_ROSEN                               |
| GSM447571 | FVB_MMTV_Wnt1_JGFR2_3861_3L_ROSEN                               |
| GSM447572 | FVB_MMTV_Wnt1_IR2_5101_3L_Rosen                                 |
| GSM447573 | FVB_MMTV_Wnt1_IR2_5103_3L_Rosen                                 |
| GSM447574 | FVB_MMTV_Wnt1_IR2_5105_3L_Rosen                                 |
| GSM447575 | FVB_MMTV_Wnt1_IR2_5106_3L_Rosen                                 |
| GSM660763 | Balbc_p53null_transplant_T1-3                                   |
| GSM661689 | Balbc_p53het_IR_A2989-7_KOLLER_44K                              |
| GSM661692 | Balbc_p53het_IR_C0323-4_KOLLER_44K                              |
| GSM661694 | BALBc_p53null_spontaneous_4100R_MEDINA                          |
| GSM661695 | BALBc_p53null_spontaneous_4127R_MEDINA                          |
| GSM661696 | BALBc_p53null_spontaneous_4702L_MEDINA                          |
| GSM661697 | BALBc_p53null_spontaneous_4729L_MEDINA                          |
| GSM661698 | BALBc_p53null_spontaneous_2297R_MEDINA                          |
| GSM661699 | Balbc_p53null_2153R_transplant_JIH                              |
| GSM661700 | Balbc_p53null_2208L_transplant_JIH                              |
| GSM661702 | Balbc_p53null_2225L_transplant_JIH                              |
| GSM661703 | Balbc_p53null_2225R_transplant_JIH                              |
| GSM661704 | Balbc_p53null_2245R_transplant_JIH                              |
| GSM661706 | Balbc_p53null_2250L_transplant_JIH                              |
| GSM661707 | Balbc_p53null_2304L_transplant_JIH                              |
| GSM661708 | Balbc_p53null_2333R_transplant_JIH                              |
| GSM661709 | Balbc_p53null_T2-336_transplant_JIH                             |
| GSM661710 | Balbc_p53null_T7_transplant_JIH                                 |
| GSM661711 | Balbc_p53null_transplant_2151L_JIH_repeat                       |
| GSM661712 | Balbc_p53null_transplant_2151L_JIH_repeat                       |
| GSM662192 | Balbc_p53null_transplant_2153L_JIH                              |
| GSM662193 | Balbc_p53null_transplant_2154L_JIH                              |
| GSM662194 | Balbc_p53null_transplant_2209R_JIH                              |
| GSM662195 | Balbc_p53null_transplant_2210L_JIH                              |
| GSM662196 | Balbc_p53null_transplant_2211L_JIH                              |
| GSM662197 | Balbc_p53null_transplant_2211R_JIH                              |
| GSM662198 | Balbc_p53null_transplant_2224L_JIH                              |
| GSM662199 | Balbc_p53null_transplant_2228R_JIH                              |
| GSM662200 | Balbc_p53null_transplant_2243L_JIH                              |
| GSM662201 | Balbc_p53null_transplant_2249L_JIH                              |
| GSM662202 | Balbc_p53null_transplant_2331L_JIH                              |
| GSM662203 | Balbc_p53null_transplant_2336R_JIH                              |
| GSM662204 | Balbc_p53null_transplant_2349L_JIH                              |
| GSM662205 | Balbc_p53null_transplant_2349R_JIH                              |
| GSM662206 | Balbc_p53null_transplant_2350R_JIH                              |
| GSM662207 | Balbc_p53null_transplant_2356R_JIH                              |
| GSM662208 | Balbc_p53null_transplant_2374L_JIH                              |
| GSM662209 | Balbc_p53null_transplant_2374R_JIH                              |
| GSM662210 | Balbc_p53null_transplant_2377R_JIH                              |
| GSM662211 | Balbc_p53null_transplant_2393R_JIH                              |
| GSM662231 | Balbc_p53null_transplant_2398R_JIH                              |
| GSM662232 | Balbc_p53null_transplant_2397L_JIH                              |
| GSM662233 | Balbc_p53null_transplant_2412R_JIH                              |
| GSM662234 | Balbc_p53null_transplant_2530R_JIH                              |
| GSM662236 | Balbc_p53null_transplant_T1-355-3_JIH                           |
| GSM662237 | FVB_C3(1)-Tag-120555_PEROU                                      |
| GSM662238 | FVB_C3(1)-Tag-121415_PEROU                                      |
| GSM662239 | FVB_C3(1)-Tag_116409C_PEROU                                     |
| GSM662240 | FVB_C3(1)-Tag_116410B_PEROU                                     |
| GSM662241 | FVB_C3(1)-Tag_117338-1_PEROU                                    |
| GSM662242 | FVB_C3(1)-Tag_117517_PEROU                                      |
| GSM662243 | FVB_C3(1)-Tag_120157_PEROU                                      |
| GSM662245 | FVB_MMTV_Neu_110277_PEROU                                       |
| GSM662246 | FVB_MMTV_Neu_110288_PEROU                                       |
| GSM662247 | FVB_MMTV_Neu_116913_PEROU                                       |

|           |                                               |
|-----------|-----------------------------------------------|
| GSM662248 | FVB_MMTV_Neu_116916_PEROU                     |
| GSM662249 | FVB_MMTV_Neu_116922_PEROU                     |
| GSM662250 | FVB_MMTV_Neu_117391_PEROU                     |
| GSM69576  | BALB_BRCA1het_p53het_IR_B1129_4_KOLLER        |
| GSM69577  | BALB_BRCA1het_p53het_IR_B9964_6_KOLLER        |
| GSM69578  | BALB_BRCA1het_p53het_IR_B9965_1_KOLLER        |
| GSM69579  | BALB_BRCA1het_p53het_IR_C0379_5_KOLLER        |
| GSM69580  | BALB_p53het_IR_10915_7_KOLLER                 |
| GSM69581  | BALB_p53het_IR_A1446_1_KOLLER_repeat          |
| GSM69582  | BALB_p53het_IR_A2989_7_KOLLER                 |
| GSM69583  | BALB_p53het_IR_A5824_7_KOLLER                 |
| GSM69584  | BALB_TgWAPT121_KS555                          |
| GSM69585  | BALB_TgWAPT121_KS556                          |
| GSM69586  | BDF1_TgWAPT121p53het_KS581_Solid              |
| GSM69588  | BDF1_TgWAPT121_KS643_Solid                    |
| GSM69589  | BDF1_TgWAPT121_KS644_Solid+Gland              |
| GSM69590  | FVB_C3(1)_Tag_#72_GREEN                       |
| GSM69591  | FVB_C3(1)_Tag_#74_GREEN                       |
| GSM69592  | FVB_C3(1)_Tag_#76_GREEN                       |
| GSM69593  | FVB_C3(1)_Tag_#84_GREEN                       |
| GSM69594  | FVB_C3(1)_Tag_#86_GREEN                       |
| GSM69595  | FVB_C3(1)_Tag_E29_1A_614_BROWN                |
| GSM69596  | FVB_C3(1)_Tag_E29_2A_632_BROWN                |
| GSM69597  | FVB_C3(1)_Tag_E29_5A_645_BROWN                |
| GSM69601  | FVB_DMBA_1_Adeno_GLAZER_repeat                |
| GSM69602  | FVB_DMBA_2_Adeno_GLAZER                       |
| GSM69603  | FVB_DMBA_3_Adeno_GLAZER_repeat                |
| GSM69604  | FVB_DMBA_4_Adeno_GLAZER                       |
| GSM69605  | FVB_DMBA_5_Squa_GLAZER                        |
| GSM69606  | FVB_DMBA_6_Squa_GLAZER                        |
| GSM69607  | FVB_DMBA_8_Squa_GLAZER                        |
| GSM69608  | FVB_DMBA_9_Squa_GLAZER                        |
| GSM69609  | FVB_DMBA_9_Squa_GLAZER_repeat                 |
| GSM69611  | FVB_MMTV_Neu_7-6-99_GREEN                     |
| GSM69612  | FVB_MMTV_Neu_8-2-99_GREEN                     |
| GSM69613  | FVB_MMTV_Neu_CA01_416A_CHURCHILL              |
| GSM69614  | FVB_MMTV_Neu_CA01_416C_repeat_CHURCHILL       |
| GSM69615  | FVB_MMTV_Neu_CA01_431A_CHURCHILL              |
| GSM69616  | FVB_MMTV_Neu_CA01_432A_CHURCHILL              |
| GSM69617  | FVB_MMTV_PyVT_31_SIMIN                        |
| GSM69618  | FVB_MMTV_PyVT_89_SIMIN                        |
| GSM69619  | FVB_MMTV_PyVT_91#2_SIMIN                      |
| GSM69620  | FVB_MMTV_PyVT_91#3_SIMIN                      |
| GSM69621  | FVB_MMTV_PyVT_91_SIMIN                        |
| GSM69622  | FVB_MMTV_Wnt1_CA02_467A_CHURCHILL             |
| GSM69623  | FVB_MMTV_Wnt1_CA02_478A_CHURCHILL             |
| GSM69624  | FVB_MMTV_Wnt1_CA02_486A_CHURCHILL             |
| GSM69625  | FVB_MMTV_Wnt1_CA02_493A_CHURCHILL             |
| GSM69626  | FVB_MMTV_Wnt1_CA02_506A_CHURCHILL             |
| GSM69627  | FVB_MMTV_Wnt1_CA02_570A_CHURCHILL             |
| GSM69628  | FVB_MMTV_Wnt1_CA02_570B_CHURCHILL             |
| GSM69629  | FVB_MMTV_Wnt1_CA03_587A_CHURCHILL             |
| GSM69630  | FVB_MMTV_Wnt1_CA03_634A_CHURCHILL             |
| GSM69636  | FVB_Wap_Int3_CA01_426A_CHURCHILL_repeat       |
| GSM69637  | FVB_Wap_Int3_CA01_433A_CHURCHILL              |
| GSM69638  | FVB_Wap_Int3_CA01_433A_dup2_CHURCHILL         |
| GSM69639  | FVB_Wap_Int3_CA01_433A_dup_CHURCHILL          |
| GSM69640  | FVB_Wap_Int3_CA01_434A_CHURCHILL              |
| GSM69641  | FVB_Wap_Int3_CA01_434A_CHURCHILL_repeat       |
| GSM69642  | FVB_Wap_Int3_CA02_437A_CHURCHILL              |
| GSM69643  | FVB_Wap_Int3_CA02_566A_CHURCHILL              |
| GSM69644  | FVB_Wap_Int3_CA02_575A_CHURCHILL              |
| GSM69645  | FVB_Wap_Myc_CA02_540A_CHURCHILL               |
| GSM69646  | FVB_Wap_Myc_CA02_540B_spindloid_CHURCHILL     |
| GSM69647  | FVB_Wap_Myc_CA02_540B_spindloid_dup_CHURCHILL |
| GSM69648  | FVB_Wap_Myc_CA02_544A_dup_CHURCHILL           |
| GSM69649  | FVB_Wap_Myc_CA02_545A_CHURCHILL               |
| GSM69650  | FVB_Wap_Myc_CA02_548A_CHURCHILL               |
| GSM69651  | FVB_Wap_Myc_CA02_549A_CHURCHILL               |
| GSM69652  | FVB_Wap_Myc_CA02_550A_spindloid_CHURCHILL     |
| GSM69653  | FVB_Wap_Myc_CA02_567C_CHURCHILL               |
| GSM69654  | FVB_Wap_Myc_CA02_569A_CHURCHILL               |
| GSM69655  | FVB_Wap_Myc_CA02_579C_CHURCHILL               |
| GSM69656  | FVB_Wap_Myc_CA02_579F_CHURCHILL               |
| GSM80424  | FVB_MMTV_PyVT_575_Usary                       |
| GSM80425  | FVB_MMTV_PyVT_430_Usary                       |
| GSM80426  | FVB_MMTV_Neu_CA05_861A_CHURCHILL              |
| GSM80427  | FVB_MMTV_Neu_CA05_875A_CHURCHILL              |
| GSM80428  | FVB_Wap_Myc_CA05_869A_CHURCHILL               |
| GSM80429  | FVB_MMTV_Wnt1_CA04_676A_CHURCHILL             |
| GSM80431  | C57BL_6J_Wap_Tag_CA_224A_CHURCHILL            |
| GSM80432  | FVB_Wap_Myc_CA05_867A_CHURCHILL               |
| GSM80433  | C57BL_6J_Wap_Tag_CA_215A_CHURCHILL            |
| GSM80434  | C57BL_6J_Wap_Tag_CA_213A_CHURCHILL            |
| GSM80435  | C57Bl6_MMTV_Cre_BRCA1CoCo_p53het_106c1_FURTH  |
| GSM80438  | BALB_BRCA1het_p53het_IR_C0912_13_KOLLER       |
| GSM80439  | BALB_BRCA1het_p53het_IR_C0912_4_KOLLER        |
| GSM80440  | BALB_BRCA1het_p53het_IR_C0912_12_KOLLER       |
| GSM80441  | BALB_p53het_IR_C0323_4_KOLLER                 |
| GSM80442  | BALB_p53het_IR_C1301_1_KOLLER                 |
| GSM80443  | C57Bl6_MMTV_Cre_BRCA1CoCo_p53het_129_FURTH    |
| GSM80444  | C57Bl6_MMTV_Cre_BRCA1CoCo_p53het_172d_FURTH   |
| GSM80445  | C57Bl6_MMTV_Cre_BRCA1CoCo_p53het_145a2_FURTH  |
| GSM80446  | C57Bl6_MMTV_Cre_BRCA1CoCo_p53het_96b_FURTH    |
| GSM80447  | C57Bl6_MMTV_Cre_BRCA1CoCo_p53het_113a_FURTH   |
| GSM80448  | C57Bl6_MMTV_Cre_BRCA1CoCo_p53het_100a_FURTH   |
| GSM80449  | BDF1_WAP_T121_KS150_SIMIN                     |
| GSM80450  | FVB_MMTV_Neu_59331_USARY                      |
| GSM80451  | PB_p53null_3941R                              |
| GSM80452  | PB_p53null_3939R                              |
| GSM80454  | FVB_MMTV_Wnt1_CA04_663A_CHURCHILL             |
| GSM80455  | C57BL_6J_Wap_Tag_CA_226A_CHURCHILL            |
| GSM80457  | C57BL_6J_Wap_Tag_CA_226B_CHURCHILL            |
| GSM80458  | PB_p53null_1634R                              |
| GSM80459  | PB_p53null_4304R                              |
